# Supplementary material for: Evaluation of blood pressure using a flexible and wearable capacitive pressure sensor
Source: Royal Society of Chemistry journal article supplement (doi:10.1039/d3ra06447f), 2023-01-01
Supplement: d3ra06447f1.pdf [file d3ra06447f1.pdf]

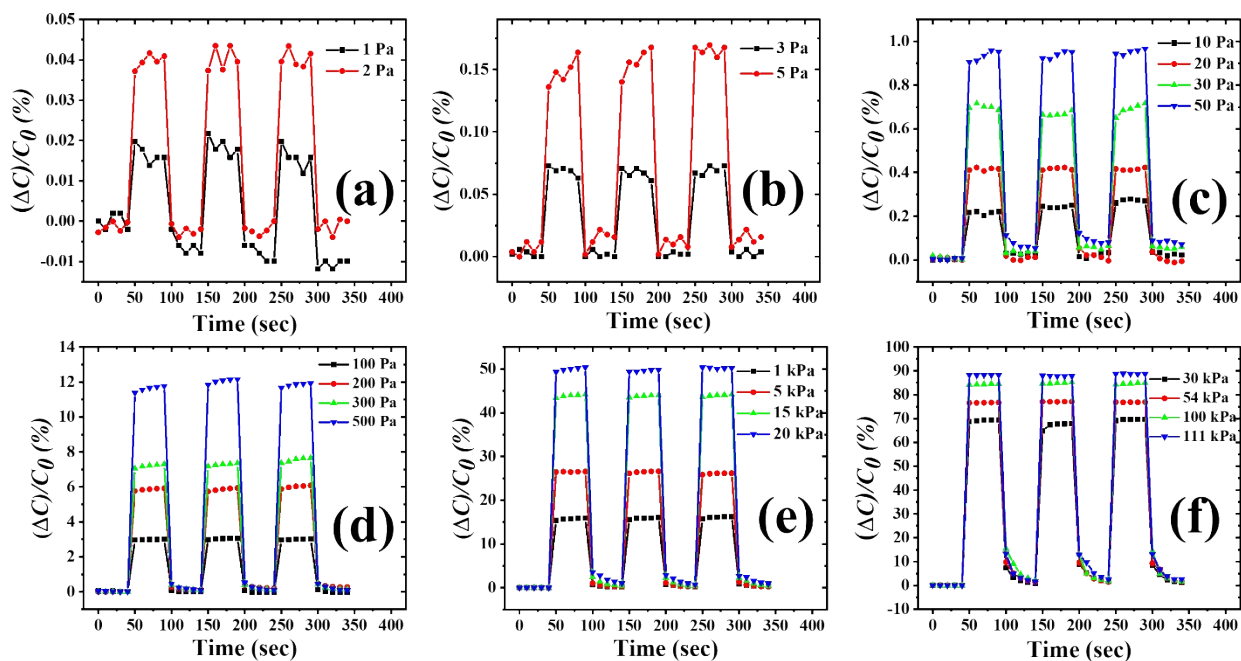

**Figure S1.** Variation of relative change in capacitance as a function of time at different applied pressure range of (a) 1 Pa – 2 Pa. (b) 3 Pa – 5 Pa. (c) 10 Pa – 50 Pa. (d) 100 Pa – 500 Pa. (e) 1 kPa – 20 kPa. (f) 30 kPa – 111 kPa.

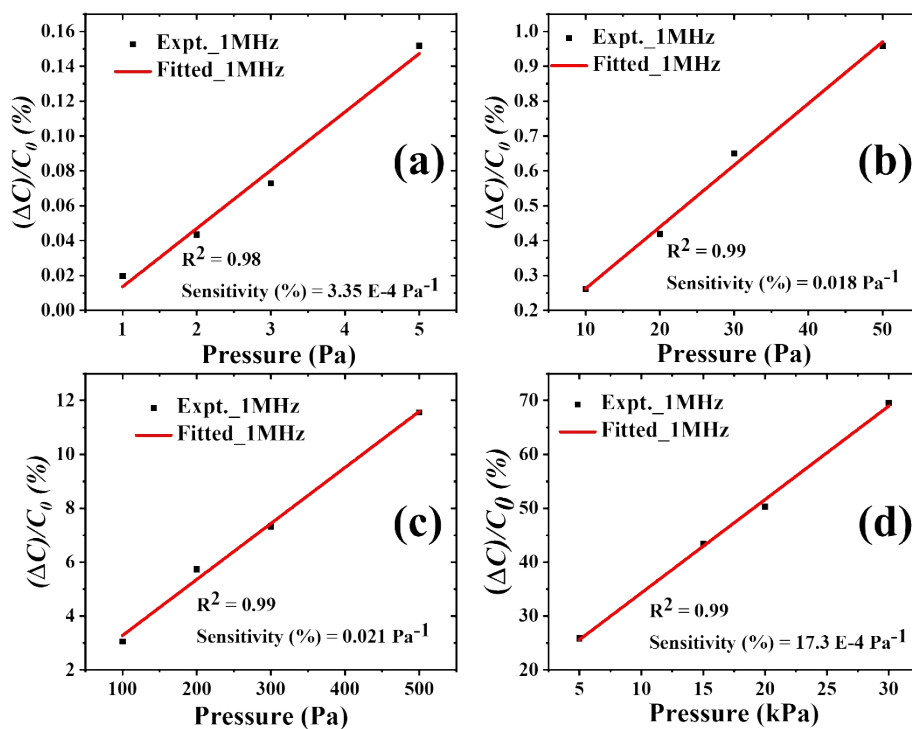

**Figure S2.** Variation of capacitance change ( $\Delta C/C_0$ ) as a function of applied pressure range to calculate the sensitivity in pressure regions of (a) 1 Pa – 5 Pa. (b) 10 Pa to 50 Pa (c) 100 Pa to 500 Pa and (d) 5 kPa to 30 kPa.

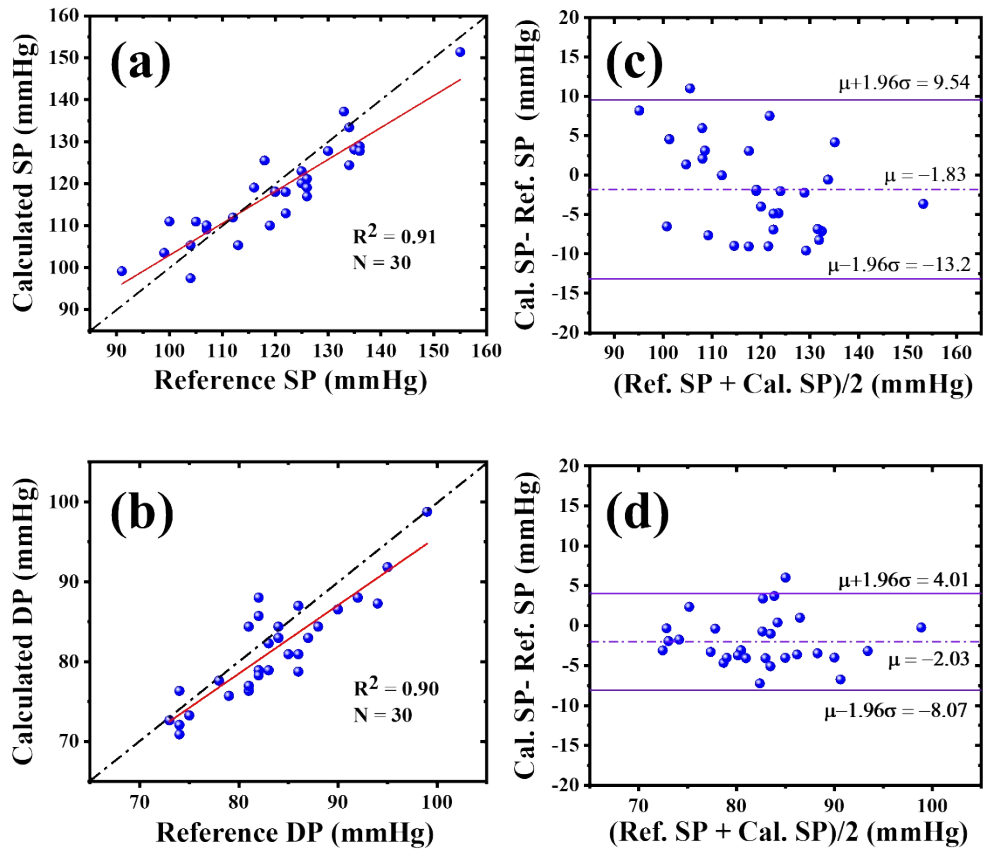

**Figure S3.** The correlation (a, b) and Bland-Altman (c, d) plots to compare the determined systolic and diastolic from the sensor to mercury-based sphygmomanometer.

| <b>Category</b>             | <b>Systolic BP</b> | <b>Diastolic BP</b> |
|-----------------------------|--------------------|---------------------|
| <b>Hypotension</b>          | <b>&lt; 90</b>     | <b>&lt; 60</b>      |
| <b>Low normal</b>           | <b>90-120</b>      | <b>60-80</b>        |
| <b>Normal</b>               | <b>120-129</b>     | <b>80-84</b>        |
| <b>High Normal</b>          | <b>130-139</b>     | <b>85-89</b>        |
| <b>Grade 1 Hypertension</b> | <b>140-159</b>     | <b>90-99</b>        |
| <b>Grade 2 Hypertension</b> | <b>160-179</b>     | <b>100-109</b>      |
| <b>Grade 3 Hypertension</b> | <b>≥ 180</b>       | <b>≥ 110</b>        |

*Table ST1. Categories of human blood pressure.*
